# Supplementary material for: A new process for the recovery of palladium from a spent Pd/TiO2 catalyst through a combination of mild acidic leaching and photodeposition on ZnO nanoparticles
Source: Royal Society of Chemistry journal article supplement (doi:10.1039/d2re00240j), 2022-11-18
Supplement: d2re00240j1.pdf [file d2re00240j1.pdf]

# Supplementary materials

## Near-zero waste process for the recovery of palladium from a spent Pd/TiO<sub>2</sub> catalyst through a sequential process of mild acidic leaching and photodeposition on ZnO nanoparticles

### Authors

Marica Muscetta<sup>a\*</sup>, Giulio Pota<sup>a</sup>, Giuseppe Vitiello<sup>a</sup>, Samar Al Jitan<sup>b</sup>, Giovanni Palmisano<sup>b</sup>, Roberto Andreozzi<sup>a</sup>, Raffaele Marotta<sup>a</sup>, Ilaria Di Somma<sup>c\*</sup>

<sup>a</sup>Dipartimento di Ingegneria Chimica, dei Materiali e della Produzione Industriale, Università di Napoli "Federico II", Italia.

<sup>b</sup>Department of Chemical Engineering, Center for Membranes and Advanced Water Technology (CMAT Center) and Research and Innovation Center on CO<sub>2</sub> and Hydrogen (RICH Center), Khalifa University, P.O. Box 127788, Abu Dhabi, United Arab Emirates.

<sup>c</sup>Istituto di Scienze e Tecnologie per l'Energia e la Mobilità Sostenibili (CNR), Napoli, Italia.

\*Corresponding author: [marica.muscetta@unina.it](mailto:marica.muscetta@unina.it) (M. Muscetta);

[ilaria.disomma@stems.cnr.it](mailto:ilaria.disomma@stems.cnr.it) (I. Di Somma).

### 1. DRUV-vis spectroscopy

**Table S – 1.** E<sub>g</sub> values (eV) detected for all the tested photocatalysts.

| Sample                     | E <sub>g</sub> (eV) |
|----------------------------|---------------------|
| Commercial ZnO             | 3.18                |
| ZnO-S Air 200°C            | 3.23                |
| ZnO-S Air 500°C            | 3.25                |
| ZnO-S N <sub>2</sub> 200°C | 3.26                |
| ZnO-H                      | 3.23                |
| ZnO-S Air 200°C-II         | 3.27                |
| ZnO-S Air 200°C-III        | 3.26                |

## 2. XRD

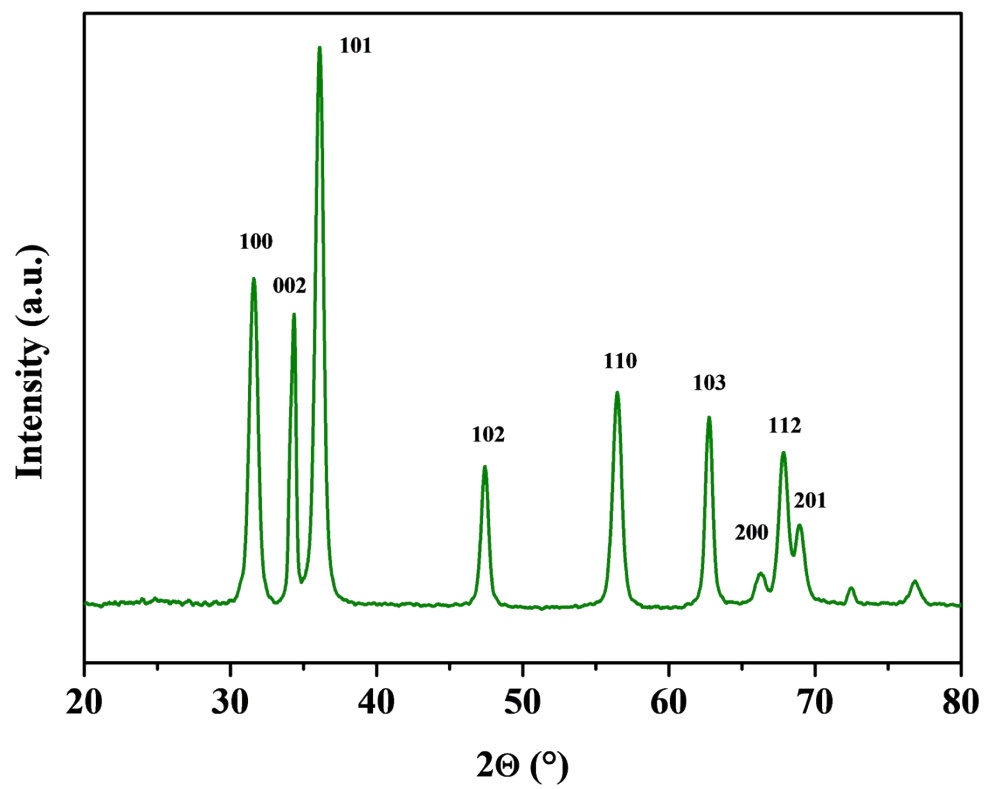

Figure S – 1. Diffractogram of ZnO-H sample.

### 3. SEM

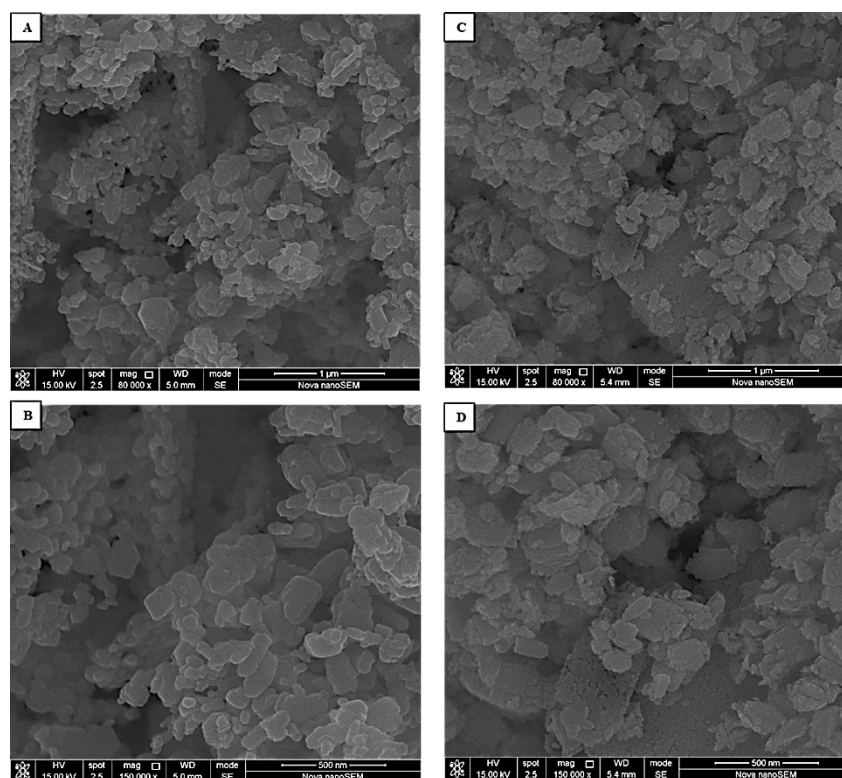

Figure S – 2. SEM images of ZnO – S Air 200°C I (A, B) and ZnO – S Air 200°C II (C, D) prepared through sol-gel synthesis.

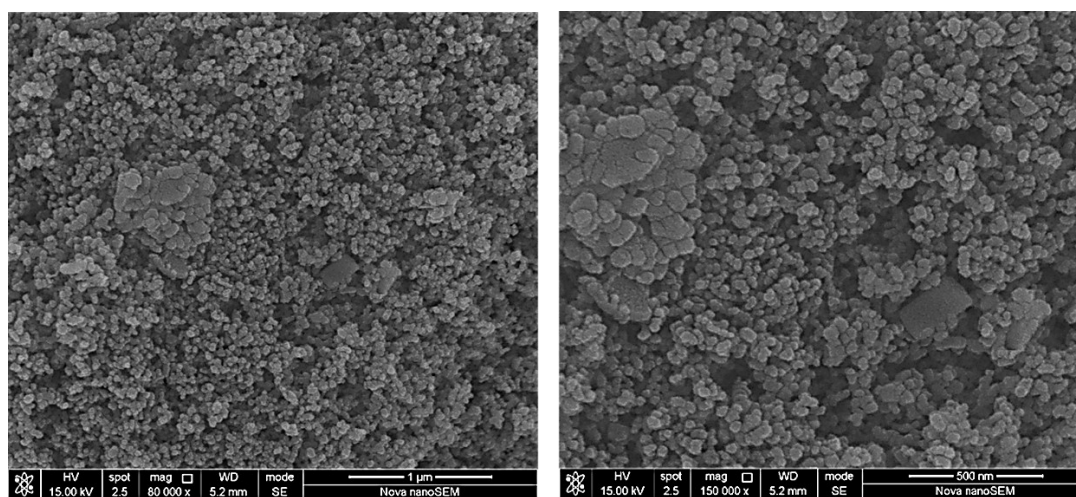

Figure S – 3. SEM images of commercial Pd/ZnO sample, recovered after the reaction.

#### 4. TEM - Particle size distribution

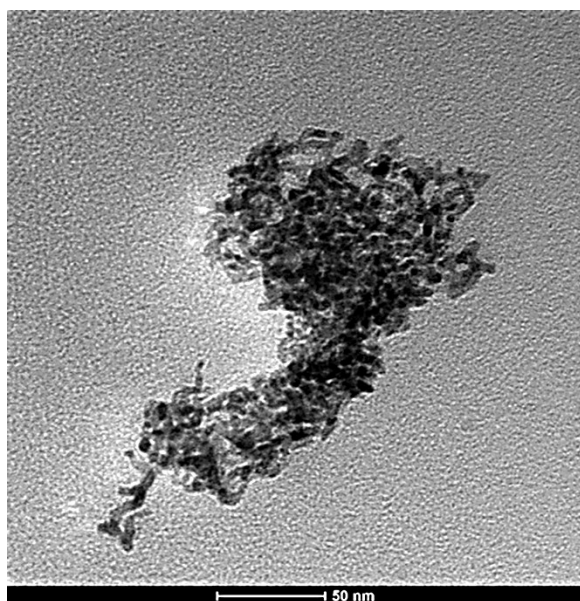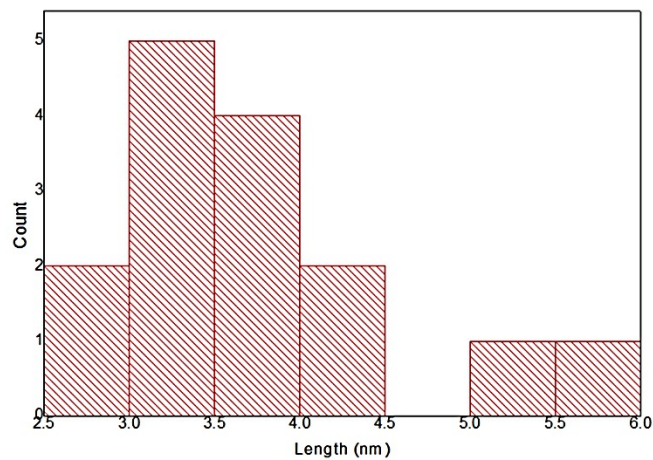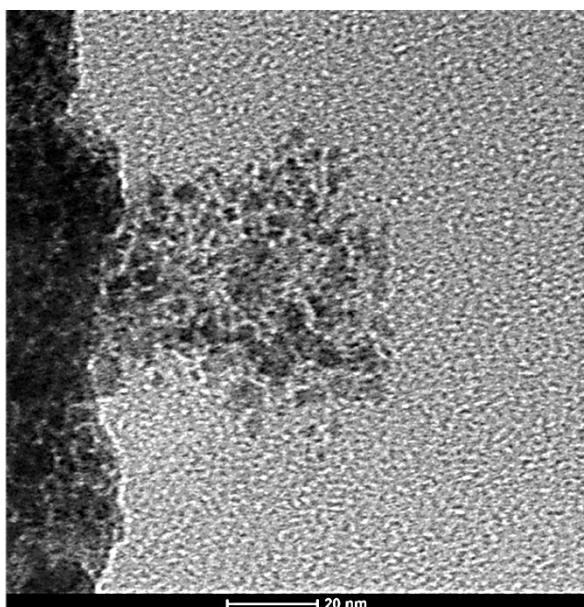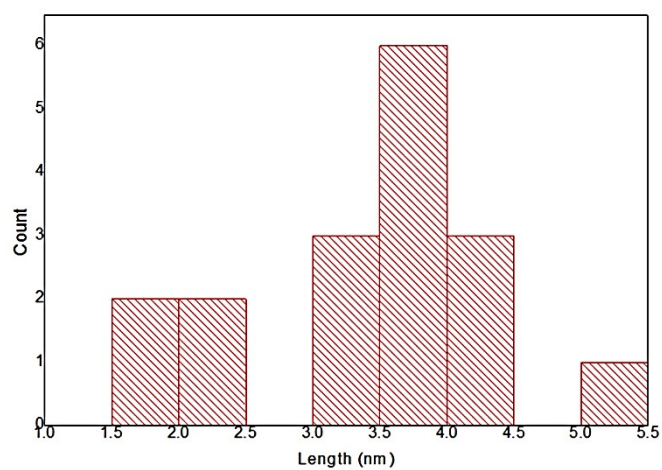

Figure S – 4. TEM micrograph images with their corresponding particle size distribution histogram for palladium recovered through photodeposition at lower (top) and higher magnification (bottom).

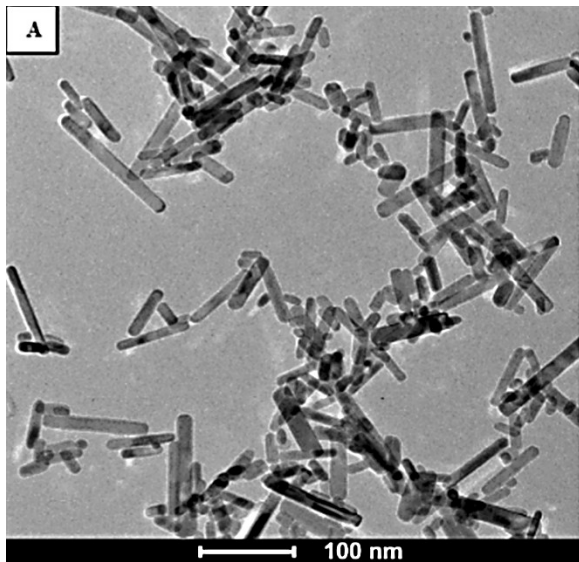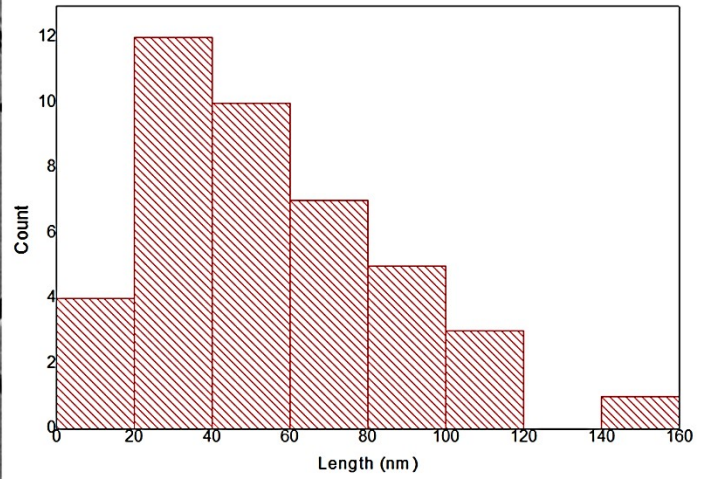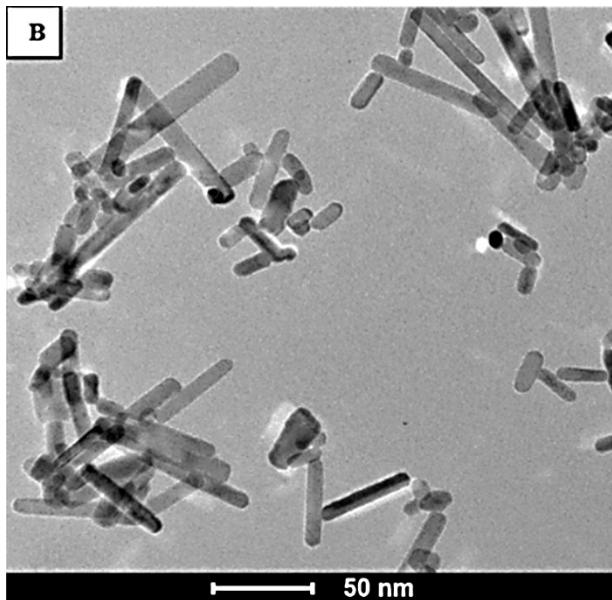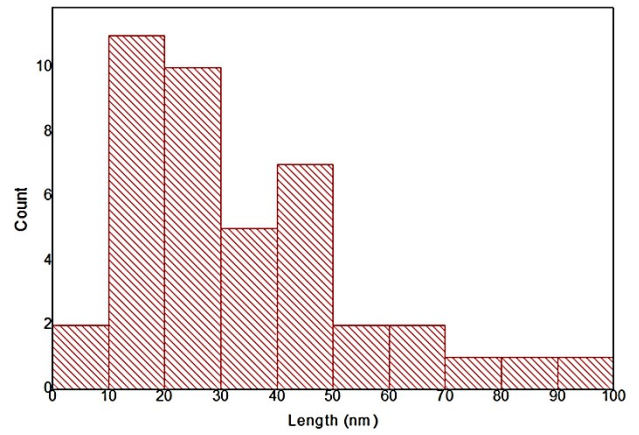

Figure S – 5. TEM micrograph images with their corresponding particle size distribution histogram for ZnO-H nanorods at lower (A) and higher magnification (B).
